# Supplementary material
Source: PubMed Central journal article supplement (PMC5876819)
Supplement: jamadermatol-e180183-s001.pdf [file jamadermatol-e180183-s001.pdf]

## Supplementary Online Content

Mason KJ, Barker J, Smith CH, et al. Comparison of drug discontinuation, effectiveness, and safety between clinical trial eligible and ineligible patients in BADBIR [published online March 28, 2018]. *JAMA Derm.* doi:10.1001/jamadermatol.2018.0183

**eFigure.** Flowchart of included patients

**eTable 1.** Data extracted from licensing trial manuscripts

**eTable 2.** Effectiveness outcome measures by biologic, eligibility and time point

**eTable 3.** Selection Bias in Effectiveness Outcomes

**eTable 4.** Incidence rates of serious adverse events by biologic, eligibility and MedDRA System Organ Class

This supplementary material has been provided by the authors to give readers additional information about their work.

### Supplementary Materials

**Figure S1**      **Flowchart of included patients**

There were 8533 registrations to the biologic cohort of BADBIR up to 1<sup>st</sup> December, 2016; 7408 (87%) of those registrations had completed at least one follow-up visit after baseline with 1509 (18%) registering on etanercept, 4000 (47%) registering on adalimumab and 1627 (19%) registering on ustekinumab.

**Figure S1**      **Flowchart of included patients**

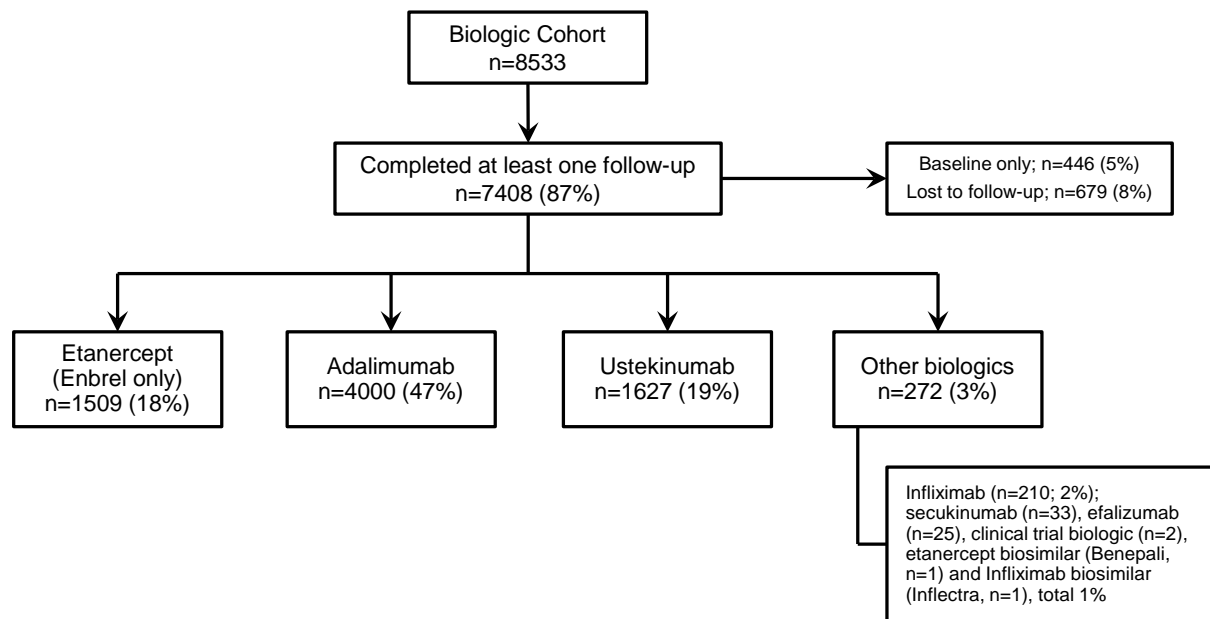

**Table S1 Data extracted from licensing trial manuscripts**

|                                                               |                          | Etanercept                                                                                                                                                                      |                          |                                | Adalimumab                                                                                        |                            | Ustekinumab                                                                                                                                                         |                           |
|---------------------------------------------------------------|--------------------------|---------------------------------------------------------------------------------------------------------------------------------------------------------------------------------|--------------------------|--------------------------------|---------------------------------------------------------------------------------------------------|----------------------------|---------------------------------------------------------------------------------------------------------------------------------------------------------------------|---------------------------|
|                                                               | Criteria                 | Leonardi et al. <sup>5</sup>                                                                                                                                                    | Papp et al. <sup>6</sup> | Tyring et al. <sup>7</sup>     | Gordon et al. <sup>8</sup>                                                                        | Menter et al. <sup>9</sup> | Leonardi et al. <sup>10</sup>                                                                                                                                       | Papp et al. <sup>11</sup> |
|                                                               | Clinical Trials ID       | ---                                                                                                                                                                             | 20021642 †               | 20030117 †                     | NCT00235820                                                                                       | NCT00237887                | NCT00267969                                                                                                                                                         | NCT00307437               |
| Inclusions                                                    | Age ≥ 18 years           | ✓                                                                                                                                                                               | ✓                        | ✓                              | ✓                                                                                                 | ✓                          | ✓                                                                                                                                                                   | ✓                         |
|                                                               | Chronic plaque diagnosis | ✓                                                                                                                                                                               | ✓                        | ✓                              | ≥ 1 year                                                                                          | ≥ 6 months                 | ≥ 6 months                                                                                                                                                          |                           |
|                                                               | Washout periods          | Topical 2 weeks; systemics 4 weeks; biologics not specified                                                                                                                     |                          |                                | Topical 2 weeks; systemics 4 weeks; biologics 12 weeks; Raptiva 6 weeks                           |                            | Topical 2 weeks; systemics 4 weeks; IP/biologics 12 weeks or 5 half-lives                                                                                           |                           |
|                                                               | PASI                     | ≥ 10                                                                                                                                                                            | ≥ 10                     | ≥ 10                           | ---                                                                                               | ≥ 12                       | ≥ 12                                                                                                                                                                |                           |
|                                                               | BSA                      | ≥ 10%                                                                                                                                                                           | ≥ 10%                    | ≥ 10%                          | ≥ 5%                                                                                              | ≥ 10%                      | ≥ 10%                                                                                                                                                               |                           |
|                                                               | PGA                      | ---                                                                                                                                                                             | ---                      | ---                            | ---                                                                                               | Moderate ≥ 4               | ---                                                                                                                                                                 | ---                       |
|                                                               | Prior systemic exposures | ≥ 1 UV / systemic                                                                                                                                                               |                          |                                | ---                                                                                               | ---                        | ---                                                                                                                                                                 | ---                       |
| Exclusions                                                    | Prior biologic exposures | TNFi-antagonists                                                                                                                                                                |                          |                                | TNFi-antagonists                                                                                  | TNFi-antagonists           |                                                                                                                                                                     | IL-12/23 antagonists      |
|                                                               | Comorbidities            | ---                                                                                                                                                                             |                          | Psychiatric; suicidal ideation | Demyelinating disease                                                                             |                            | Severe, progressive, or uncontrolled: renal, hepatic, haematological, gastrointestinal, endocrine, pulmonary, cardiac, neurologic, cerebral, or psychiatric disease |                           |
|                                                               |                          | Uncontrolled hypertension; MI (past year); demyelinating disease; unstable angina pectoris; uncompensated congestive heart failure; severe pulmonary disease; diabetes mellitus |                          |                                | Gastrointestinal; haematological; significant abnormal laboratory test results; immunocompromised |                            |                                                                                                                                                                     |                           |
|                                                               | Infections               | Antibiotics in past week; infection in past 4 weeks                                                                                                                             |                          |                                | Untreated latent TB; listeriosis; recent serious local or systemic infection                      |                            | Untreated latent TB; recent serious local or systemic infection; HIV, Hepatitis B or C                                                                              |                           |
|                                                               | Cancer                   | Previous 5 years **                                                                                                                                                             |                          |                                | Ever *                                                                                            |                            | Previous 5 years **                                                                                                                                                 |                           |
|                                                               | Females                  | Pregnant or breast-feeding females                                                                                                                                              |                          |                                | No contraception                                                                                  |                            | No contraception, pregnant or breast-feeding                                                                                                                        |                           |
| Outcomes                                                      | Efficacy (PASI 75) ‡     | 12 weeks (49% <sup>1</sup> ; 49% <sup>2</sup> ; 47% <sup>3</sup> ) and 24 weeks (59% <sup>1</sup> ; 54% <sup>2</sup> )                                                          |                          |                                | 12 (53%), 24 (64%), & 60 (56%) weeks                                                              | 16 (71%) weeks             | 12 weeks (66% <sup>6</sup> and 79% <sup>7</sup> ) and 28 weeks (71% <sup>6</sup> and 79% <sup>7</sup> )                                                             |                           |
|                                                               | Safety (total events)    | 12 & 24 weeks                                                                                                                                                                   |                          | 12 weeks                       | 12 & 60 weeks                                                                                     | 16 weeks                   | 12, 40 & 76 weeks                                                                                                                                                   | 12, 28 & 52 weeks         |
| Eligibility criteria identified from additional sources (text |                          | Papp et al. (2012) <sup>12</sup> - specimen criteria (NCT00121615; 20040216 †); summarises findings                                                                             |                          |                                | AbbVie report M02-529                                                                             | AbbVie report M03-656      | <a href="http://clinicaltrials.gov">clinicaltrials.gov</a> using clinical trials ID                                                                                 |                           |

|         |                                                                           |                                               |  |
|---------|---------------------------------------------------------------------------|-----------------------------------------------|--|
| in red) | from all three studies above and details additional eligibility criteria. | Specimen criteria (NCT00646191) <sup>13</sup> |  |
|---------|---------------------------------------------------------------------------|-----------------------------------------------|--|

--- = not reported; ✓ = reported as inclusion criterion; ID = identifier; IP = investigational product; PASI = Psoriasis Area and Severity Index; BSA = Body Surface Area; PGA = Physician's Global assessment; UV = ultraviolet; TNFi = tumour necrosis factor inhibitors; IL = interleukin; TB = tuberculosis; † [www.amgentrials.com](http://www.amgentrials.com) identifier; \* "other than successfully treated NMSC or localized carcinoma in situ of the cervix"; \*\* except treated NMSC; ‡ doses reported are etanercept 50mg weekly, adalimumab 40mg fortnightly and ustekinumab 90mg 12 weekly after loading schedules were complete.

**Table S2 Effectiveness outcome measures by biologic, eligibility and time point**

|                                             | Etanercept; n=568 (42%) |                     |                 | Adalimumab; n=1437 (39%) |                    |                      | Ustekinumab; n=566 (37%) |                     |                 |
|---------------------------------------------|-------------------------|---------------------|-----------------|--------------------------|--------------------|----------------------|--------------------------|---------------------|-----------------|
| PASI 75, N (%);<br>Chi <sup>2</sup> -test † | Eligible<br>n=284       | Ineligible<br>n=137 | i-PASI<br>n=145 | Eligible<br>n=910        | Ineligible<br>n=57 | i-PASI<br>n=470      | Eligible<br>n=284        | Ineligible<br>n=137 | i-PASI<br>n=145 |
| PASI 75, 6 months                           | 119 (42%)               | <b>30<br/>(22%)</b> | <b>12 (8%)</b>  | 461 (51%)                | <b>20 (35%)</b>    | <b>212<br/>(45%)</b> | 159 (56%)                | <b>47 (34%)</b>     | <b>59 (41%)</b> |
| PASI 75, 12 months                          | 130 (46%)               | <b>36<br/>(26%)</b> | 15 (10%)        | 453 (50%)                | 23 (40%)           | 216 (46%)            | 155 (55%)                | <b>50 (36%)</b>     | <b>63 (43%)</b> |
| PASI 75, 6 & 12 months                      | 83 (29%)                | <b>23<br/>(17%)</b> | 9 (6%)          | 404 (44%)                | 18 (32%)           | <b>174<br/>(37%)</b> | 141 (50%)                | <b>41 (30%)</b>     | <b>53 (37%)</b> |

i-PASI = insufficient baseline Psoriasis Area and Severity Index; † Eligible group vs Ineligible or i-PASI group; p<0.05 if bold.

**Table S3 Selection Bias in Effectiveness Outcomes**

|                                   | Complete baseline, 6 & 12 month PASI | Missing 6 month PASI | Missing 12 month PASI | Missing 6 & 12 month PASI | P-value      |
|-----------------------------------|--------------------------------------|----------------------|-----------------------|---------------------------|--------------|
| <b>Etanercept (n=1364)</b>        | <b>568 (42%)</b>                     | <b>263 (19%)</b>     | <b>238 (17%)</b>      | <b>295 (22%)</b>          |              |
| Baseline PASI; Mean ( $\pm$ SD) * | 15.4 ( $\pm$ 7.6)                    | 15.4 ( $\pm$ 7.8)    | 15.9 ( $\pm$ 8.7)     | 16.2 ( $\pm$ 7.7)         | 0.303        |
| Age, years; Mean ( $\pm$ SD) *    | 45.7 ( $\pm$ 12.9)                   | 45.2 ( $\pm$ 12.9)   | 44.9 ( $\pm$ 13.8)    | 45.7 ( $\pm$ 13.4)        | 0.828        |
| Female Sex; n (%) **              | 228 (40%)                            | 122 (46%)            | 97 (41%)              | 136 (46%)                 | 0.192        |
| <b>Adalimumab (n=3667)</b>        | <b>1437 (39%)</b>                    | <b>748 (20%)</b>     | <b>661 (18%)</b>      | <b>821 (22%)</b>          |              |
| Baseline PASI; Mean ( $\pm$ SD) * | 15.9 ( $\pm$ 7.9)                    | 15.3 ( $\pm$ 7.5)    | 15.5 ( $\pm$ 7.8)     | 15.7 ( $\pm$ 8.0)         | 0.518        |
| Age, years; Mean ( $\pm$ SD) *    | 44.7 ( $\pm$ 12.8)                   | 44.8 ( $\pm$ 12.5)   | 44.5 ( $\pm$ 12.9)    | 44.4 ( $\pm$ 12.9)        | 0.785        |
| Female Sex; n (%) **              | 596 (41%)                            | 316 (42%)            | 286 (43%)             | 327 (40%)                 | 0.594        |
| <b>Ustekinumab (n=1518)</b>       | <b>566 (37%)</b>                     | <b>303 (20%)</b>     | <b>302 (20%)</b>      | <b>347 (23%)</b>          |              |
| Baseline PASI; Mean ( $\pm$ SD) * | 16.0 ( $\pm$ 8.0)                    | 16.5 ( $\pm$ 7.9)    | 15.3 ( $\pm$ 8.6)     | 16.6 ( $\pm$ 8.5)         | <b>0.033</b> |
| Age, years; Mean ( $\pm$ SD) *    | 46.8 ( $\pm$ 13.3)                   | 46.8 ( $\pm$ 13.0)   | 45.5 ( $\pm$ 13.3)    | 46.5 ( $\pm$ 13.1)        | 0.489        |
| Female Sex; n (%) **              | 217 (38%)                            | 126 (42%)            | 122 (40%)             | 127 (37%)                 | 0.564        |

PASI = Psoriasis Area and Severity Index; \* Kruskal-Wallis test; \*\* Chi2 test; p<0.05 in bold.

**Table S4 Incidence rates of serious adverse events by biologic, eligibility and MedDRA System Organ Class**

|                  | Etanercept |                |            |                |        |                | Adalimumab |                |            |                |        |                | Ustekinumab |                |            |                |        |                |
|------------------|------------|----------------|------------|----------------|--------|----------------|------------|----------------|------------|----------------|--------|----------------|-------------|----------------|------------|----------------|--------|----------------|
|                  | Eligible   |                | Ineligible |                | i-PASI |                | Eligible   |                | Ineligible |                | i-PASI |                | Eligible    |                | Ineligible |                | i-PASI |                |
| MedDRA SOC *     | n          | IR (95% CI)    | n          | IR (95% CI)    | n      | IR (95% CI)    | n          | IR (95% CI)    | n          | IR (95% CI)    | n      | IR (95% CI)    | n           | IR (95% CI)    | n          | IR (95% CI)    | n      | IR (95% CI)    |
| All SAEs         | 42         | 226 (167, 305) | 36         | 386 (279, 536) | 9      | 249 (130, 479) | 131        | 269 (227, 319) | 34         | 514 (367, 719) | 65     | 271 (213, 346) | 40          | 282 (207, 384) | 61         | 630 (490, 809) | 18     | 237 (149, 375) |
| Blood            | 0          | ---            | 1          | 15 (2, 105)    | 0      | ---            | 0          | ---            | 0          | ---            | 1      | 5 (1, 34)      | 0           | ---            | 0          | ---            | 0      | ---            |
| Cardiac          | 3          | 19 (6, 59)     | 0          | ---            | 1      | 28 (4, 199)    | 4          | 10 (4, 27)     | 2          | 56 (14, 224)   | 3      | 14 (5, 44)     | 0           | ---            | 1          | 19 (3, 136)    | 1      | 11 (2, 79)     |
| Ear              | 0          | ---            | 0          | ---            | 1      | 28 (4, 199)    | 1          | 3 (0, 18)      | 0          | ---            | 0      | ---            | 0           | ---            | 0          | ---            | 0      | ---            |
| Endocrine        | 0          | ---            | 0          | ---            | 0      | ---            | 1          | 3 (0, 18)      | 0          | ---            | 0      | ---            | 0           | ---            | 0          | ---            | 0      | ---            |
| Eye              | 1          | 6 (1, 45)      | 0          | ---            | 0      | ---            | 1          | 3 (0, 18)      | 0          | ---            | 0      | ---            | 0           | ---            | 0          | ---            | 0      | ---            |
| Gastrointestinal | 3          | 19 (6, 59)     | 3          | 44 (14, 138)   | 1      | 28 (4, 199)    | 4          | 10 (4, 27)     | 0          | ---            | 8      | 38 (19, 76)    | 3           | 26 (8, 79)     | 4          | 77 (29, 204)   | 2      | 22 (6, 89)     |
| General          | 0          | ---            | 1          | 15 (2, 105)    | 0      | ---            | 8          | 20 (10, 40)    | 0          | ---            | 5      | 24 (10, 57)    | 1           | 9 (1, 60)      | 2          | 38 (10, 153)   | 0      | ---            |
| Hepatic          | 1          | 6 (1, 45)      | 2          | 30 (7, 118)    | 0      | ---            | 2          | 5 (1, 20)      | 0          | ---            | 1      | 5 (1, 34)      | 0           | ---            | 0          | ---            | 0      | ---            |
| Immune           | 0          | ---            | 0          | ---            | 0      | ---            | 2          | 5 (1, 20)      | 0          | ---            | 1      | 5 (1, 34)      | 0           | ---            | 0          | ---            | 0      | ---            |
| Infection        | 5          | 32 (13, 76)    | 4          | 59 (22, 158)   | 1      | 28 (4, 199)    | 25         | 63 (43, 94)    | 0          | ---            | 7      | 33 (16, 70)    | 2           | 17 (4, 68)     | 7          | 134 (64, 281)  | 4      | 45 (17, 119)   |
| Injury           | 2          | 13 (3, 51)     | 0          | ---            | 0      | ---            | 5          | 13 (5, 30)     | 2          | 56 (14, 224)   | 1      | 5 (1, 34)      | 3           | 26 (8, 79)     | 0          | ---            | 2      | 22 (6, 89)     |
| Investigations   | 0          | ---            | 2          | 30 (7, 118)    | 1      | 28 (4, 199)    | 11         | 28 (15, 50)    | 1          | 28 (4, 199)    | 9      | 43 (22, 82)    | 0           | ---            | 6          | 115 (52, 256)  | 2      | 22 (6, 89)     |
| Metabolism       | 2          | 13 (3, 51)     | 0          | ---            | 0      | ---            | 1          | 3 (0, 18)      | 0          | ---            | 1      | 5 (1, 34)      | 0           | ---            | 1          | 19 (3, 136)    | 0      | ---            |
| Musculoskeletal  | 0          | ---            | 1          | 15 (2, 105)    | 1      | 28 (4, 199)    | 0          | ---            | 2          | 56 (14, 224)   | 3      | 14 (5, 44)     | 3           | 26 (8, 79)     | 2          | 38 (10, 153)   | 0      | ---            |
| Neoplasms        | 2          | 13 (3, 51)     | 4          | 59 (22, 158)   | 1      | 28 (4, 199)    | 6          | 15 (7, 34)     | 1          | 28 (4, 199)    | 4      | 19 (7, 51)     | 4           | 34 (13, 91)    | 5          | 96 (40, 230)   | 4      | 45 (17, 119)   |
| Nervous          | 2          | 13 (3, 51)     | 0          | ---            | 2      | 56 (14, 224)   | 2          | 5 (1, 20)      | 1          | 28 (4, 199)    | 5      | 24 (10, 57)    | 2           | 17 (4, 68)     | 1          | 19 (3, 136)    | 2      | 22 (6, 89)     |

|              |   |              |   |              |   |             |    |             |   |              |   |             |   |              |   |               |   |              |
|--------------|---|--------------|---|--------------|---|-------------|----|-------------|---|--------------|---|-------------|---|--------------|---|---------------|---|--------------|
| Pregnancy    | 1 | 6 (1, 45)    | 0 | ---          | 1 | 28 (4, 199) | 5  | 13 (5, 30)  | 0 | ---          | 4 | 19 (7, 51)  | 1 | 9 (1, 60)    | 0 | ---           | 1 | 11 (2, 79)   |
| Psychiatric  | 0 | ---          | 0 | ---          | 0 | ---         | 3  | 8 (2, 24)   | 0 | ---          | 3 | 14 (5, 44)  | 1 | 9 (1, 60)    | 1 | 19 (3, 136)   | 0 | ---          |
| Renal        | 0 | ---          | 1 | 15 (2, 105)  | 0 | ---         | 3  | 8 (2, 24)   | 0 | ---          | 1 | 5 (1, 34)   | 0 | ---          | 0 | ---           | 1 | 11 (2, 79)   |
| Reproductive | 0 | ---          | 0 | ---          | 0 | ---         | 2  | 5 (1, 20)   | 0 | ---          | 1 | 5 (1, 34)   | 0 | ---          | 0 | ---           | 0 | ---          |
| Respiratory  | 0 | ---          | 0 | ---          | 0 | ---         | 11 | 28 (15, 50) | 0 | ---          | 2 | 10 (2, 38)  | 0 | ---          | 2 | 38 (10, 153)  | 0 | ---          |
| Skin         | 2 | 13 (3, 51)   | 2 | 30 (7, 118)  | 1 | 28 (4, 199) | 13 | 33 (19, 57) | 0 | ---          | 6 | 28 (13, 63) | 2 | 17 (4, 68)   | 3 | 57 (19, 178)  | 1 | 11 (2, 79)   |
| Social       | 0 | ---          | 0 | ---          | 0 | ---         | 1  | 3 (0, 18)   | 0 | ---          | 0 | ---         | 0 | ---          | 0 | ---           | 0 | ---          |
| Surgical     | 8 | 51 (25, 101) | 6 | 89 (40, 198) | 1 | 28 (4, 199) | 20 | 51 (33, 78) | 2 | 56 (14, 224) | 7 | 33 (16, 70) | 6 | 51 (23, 114) | 7 | 134 (64, 281) | 7 | 78 (37, 164) |
| Vascular     | 0 | ---          | 1 | 15 (2, 105)  | 0 | ---         | 0  | ---         | 0 | ---          | 4 | 19 (7, 51)  | 0 | ---          | 1 | 19 (3, 136)   | 0 | ---          |

i-PASI = insufficient baseline Psoriasis Area and Severity Index; n = number of events; IR = incidence rate; CI = confidence interval; MedDRA = Medical Dictionary for Regulatory Activities; SOC = System Organ Class; \* no congenital events reported.
